# Supplementary material
Source: publisher figshare collection journal article supplement (https://future-science-group.figshare.com/articles/dataset/_/21214166)
Supplement: Supplementary file 1 [file 1]

## Discovery of 1,5-diaryl-1,2,4-triazole derivatives as MYOF inhibitors and its antitumor effects in pancreatic cancer

Haijun Gu, Ting Zhang, Yunqi Li, Yuan He, Tian Guan, Weiqiong Kan, Peng He, Zhengfang Yi & Yihua Chen\*

Shanghai Key Laboratory of Regulatory Biology, The Institute of Biomedical Sciences and School of Life Sciences, East China Normal University, Shanghai 200241, China

Table S1: The optimal range of drug-likeness parameters followed by 95% of approved drugs [1]

| Molecular descriptor | Molecular weight | cLogP       | n HBA   | n HBD  | n rotatable bounds |
|----------------------|------------------|-------------|---------|--------|--------------------|
| Optimum range        | 130 to 725       | -2.0 to 6.5 | 2 to 20 | 0 to 6 | 0 to 15            |

cLogP: the calculated octanol/water partition coefficient; HBA: Hydrogen bond acceptor; HBD: Hydrogen bond donor

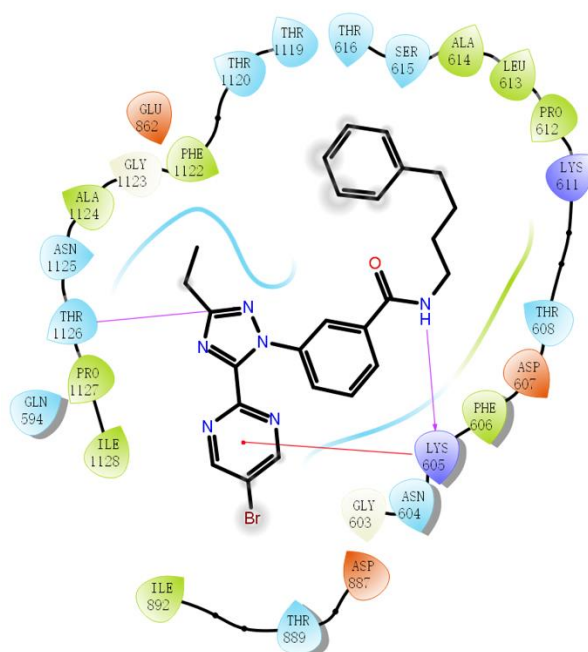

Figure S1: 2D visualization of binding postures of E4 inhibitor with MYOF

$^1\text{H}$ -NMR spectrum of **A1**.

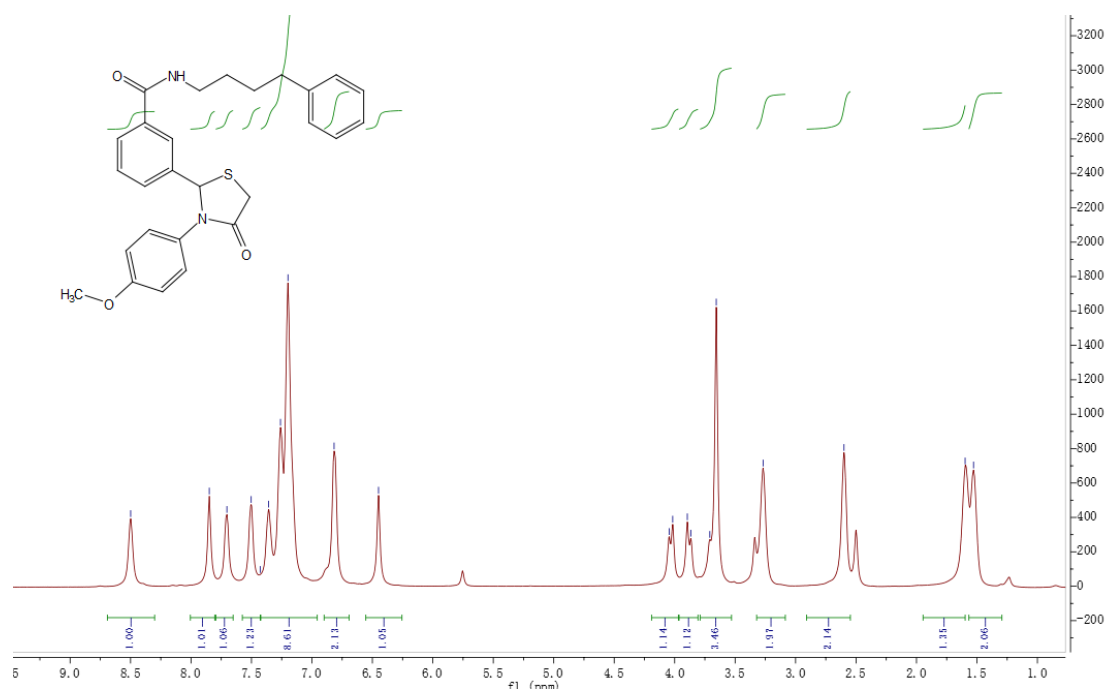

$^{13}\text{C}$  NMR spectrum of **A1**.

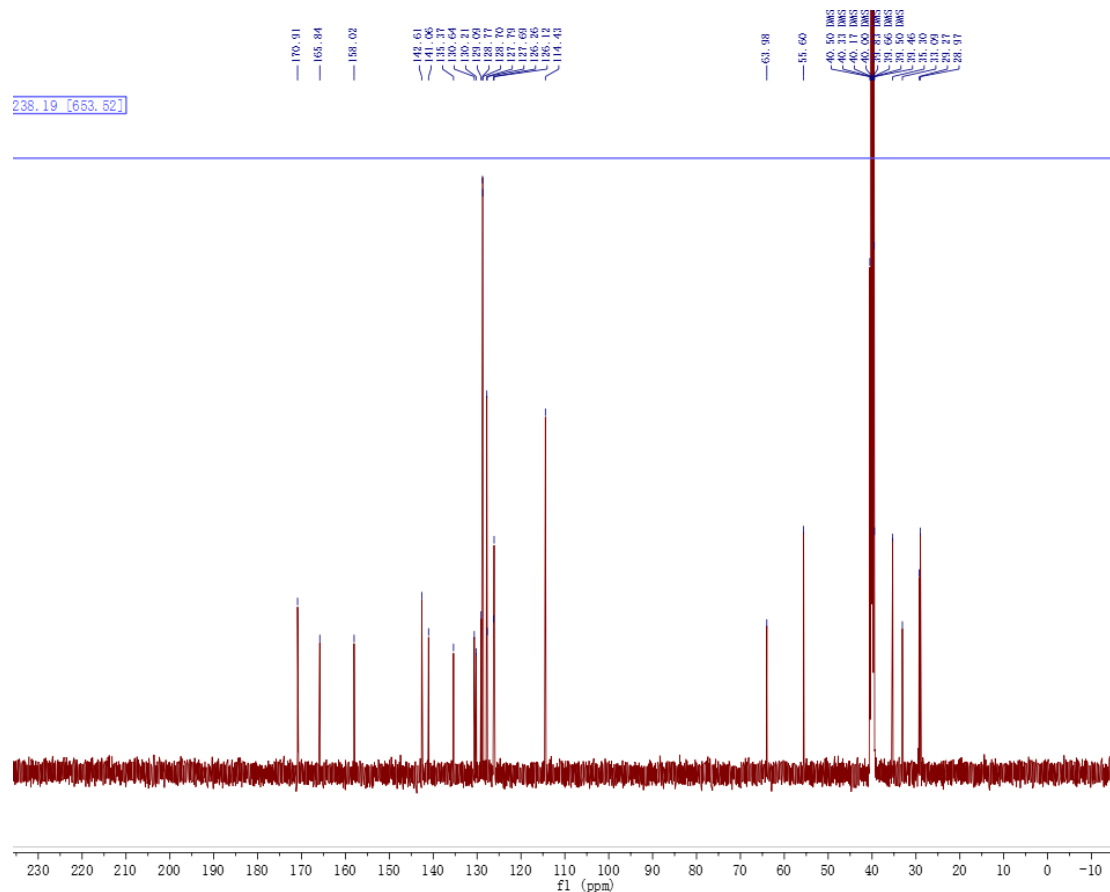

HR MS spectrum of A1.

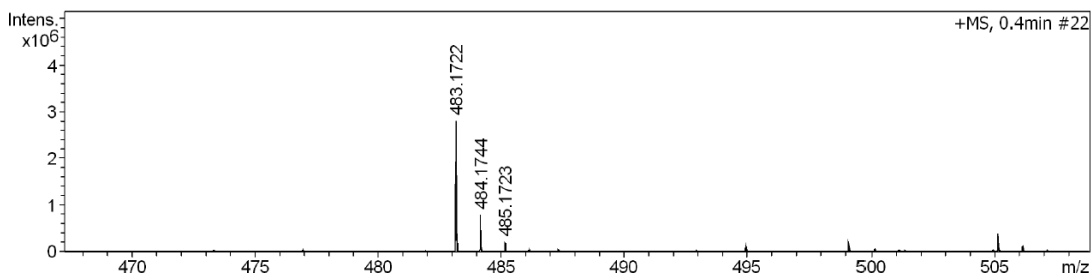

| # | m/z      | Res.  | S/N    | I       | I %   | FWHM   |
|---|----------|-------|--------|---------|-------|--------|
| 1 | 483.1722 | 25840 | 2591.7 | 2795396 | 100.0 | 0.0187 |
| 2 | 484.1744 | 27368 | 729.0  | 786140  | 28.1  | 0.0177 |
| 3 | 485.1723 | 20443 | 188.0  | 202816  | 7.3   | 0.0237 |

  

| Meas. m/z | # | Ion Formula   | m/z      | err [ppm] | mSigma | Score | rdb   | e <sup>-</sup> | Conf | N-Rule |
|-----------|---|---------------|----------|-----------|--------|-------|-------|----------------|------|--------|
| 483.1722  | 1 | C27H28N2NaO3S | 483.1713 | -2.0      | 19.9   | 1     | 63.79 | 14.5           | even | ok     |

HPLC spectrum of A1.

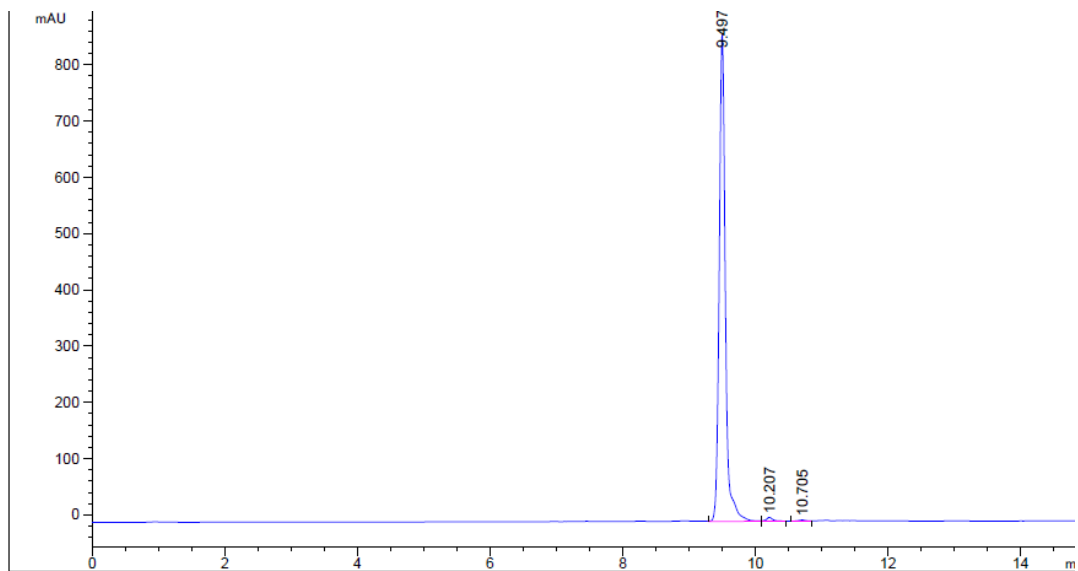

=====  
面积百分比报告  
=====

排序 : 信号  
乘积因子: 1.0000  
稀释因子: 1.0000  
内标使用乘积因子和稀释因子

信号 1: VWD1 A, 波长=254 nm

| 峰 # | 保留时间 [min] | 类型 | 峰宽 [min] | 峰面积 mAU *s | 峰高 [mAU]  | 峰面积 %   |
|-----|------------|----|----------|------------|-----------|---------|
| 1   | 9.497      | VV | 0.0973   | 5594.47119 | 865.38190 | 98.8131 |
| 2   | 10.207     | VB | 0.1039   | 48.27137   | 6.86585   | 0.8526  |
| 3   | 10.705     | BV | 0.1197   | 18.92720   | 2.29036   | 0.3343  |

总量 : 5661.66976 874.53811

<sup>1</sup>H-NMR spectrum of A2.

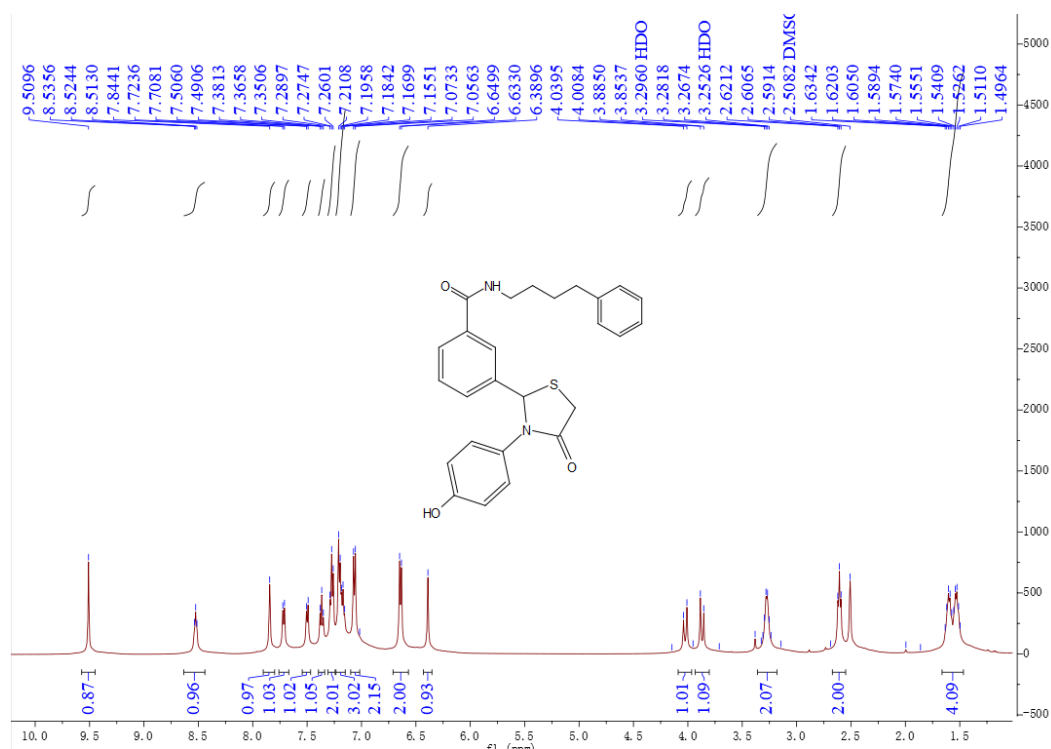

<sup>13</sup>C NMR spectrum of A2.

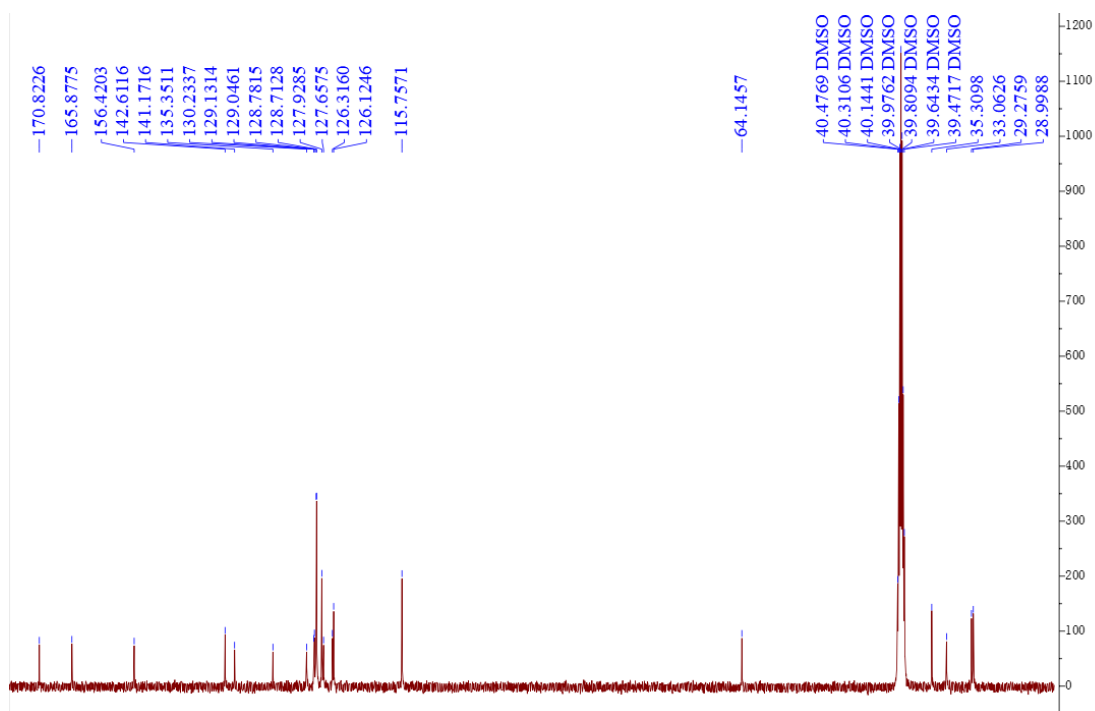

HR MS spectrum of A2.

**Analysis Info**

Analysis Name D:\Data\waixi\chenyihua\HJ-0128-446\_P1-B-9\_01\_23540.d  
Method Tune\_pos\_wide\_LC with calibration-20190508-1.m  
Sample Name HJ-0128-446  
Comment

Acquisition Date 1/29/2021 2:25:34 PM

Operator ECNU-Chem  
Instrument maXis impact 282001.00122

**Acquisition Parameter**

|             |          |                       |            |                  |           |
|-------------|----------|-----------------------|------------|------------------|-----------|
| Source Type | ESI      | Ion Polarity          | Positive   | Set Nebulizer    | 1.5 Bar   |
| Focus       | Active   | Set Capillary         | 4500 V     | Set Dry Heater   | 180 °C    |
| Scan Begin  | 50 m/z   | Set End Plate Offset  | -500 V     | Set Dry Gas      | 6.0 l/min |
| Scan End    | 3000 m/z | Set Collision Cell RF | 1700.0 Vpp | Set Divert Valve | Waste     |

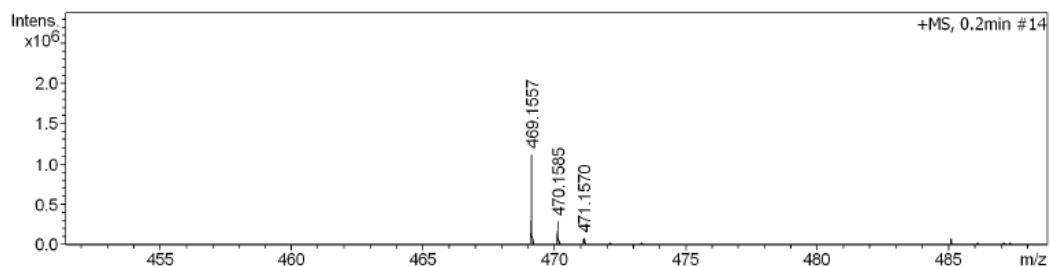

| # | m/z      | Res.  | S/N    | I       | I %   | FWHM   |
|---|----------|-------|--------|---------|-------|--------|
| 1 | 469.1557 | 26853 | 1853.7 | 1128584 | 100.0 | 0.0175 |
| 2 | 470.1585 | 20559 | 486.4  | 296620  | 26.3  | 0.0229 |
| 3 | 471.1570 | 15146 | 133.0  | 81184   | 7.2   | 0.0311 |

|           |   |                                                                   |          |           |        |       |        |                     |        |
|-----------|---|-------------------------------------------------------------------|----------|-----------|--------|-------|--------|---------------------|--------|
| Meas. m/z | # | Ion Formula                                                       | m/z      | err [ppm] | mSigma | Score | rdb    | e <sup>-</sup> Conf | N-Rule |
| 469.1557  | 1 | C <sub>26</sub> H <sub>26</sub> N <sub>2</sub> NaO <sub>3</sub> S | 469.1556 | -0.1      | 22.1   | 1     | 100.00 | 14.5 even           | ok     |

HPLC spectrum of A2.

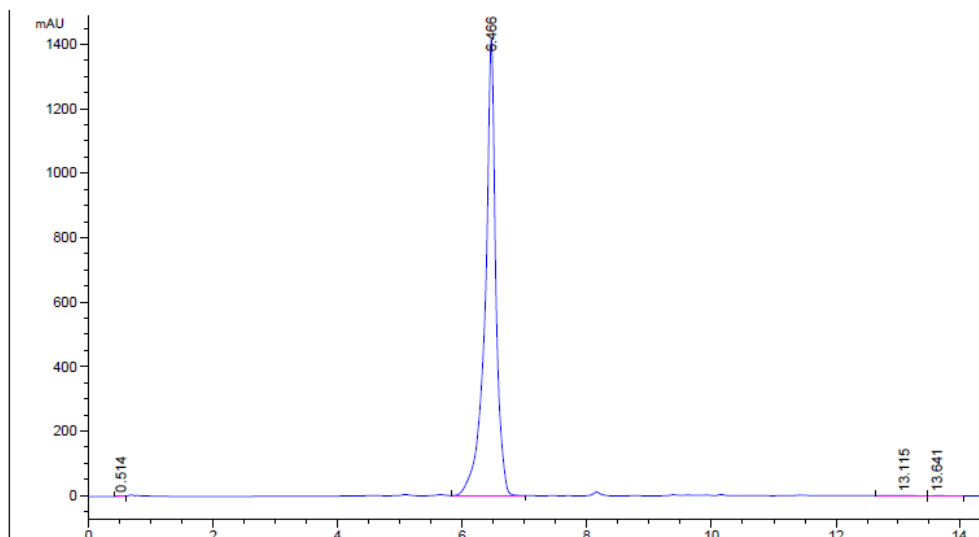

# 面积百分比报告

排序 : 信号  
 乘积因子: 1.0000  
 稀释因子: 1.0000  
 内标使用乘积因子和稀释因子

信号 1: VWD1 A, 波长=254 nm

| 峰 # | 保留时间 [min] | 类型 | 峰宽 [min] | 峰面积 mAU *s | 峰高 [mAU]   | 峰面积 %   |
|-----|------------|----|----------|------------|------------|---------|
| 1   | 0.514      | BV | 0.0818   | 8.54324    | 1.58631    | 0.0498  |
| 2   | 6.466      | VV | 0.1667   | 1.71087e4  | 1420.37097 | 99.7761 |
| 3   | 13.115     | VV | 0.5201   | 22.37261   | 5.39653e-1 | 0.1305  |
| 4   | 13.641     | VB | 0.2993   | 7.48490    | 3.41651e-1 | 0.0437  |

总量 : 1.71471e4 1422.83858

## <sup>1</sup>H-NMR spectrum of A3.

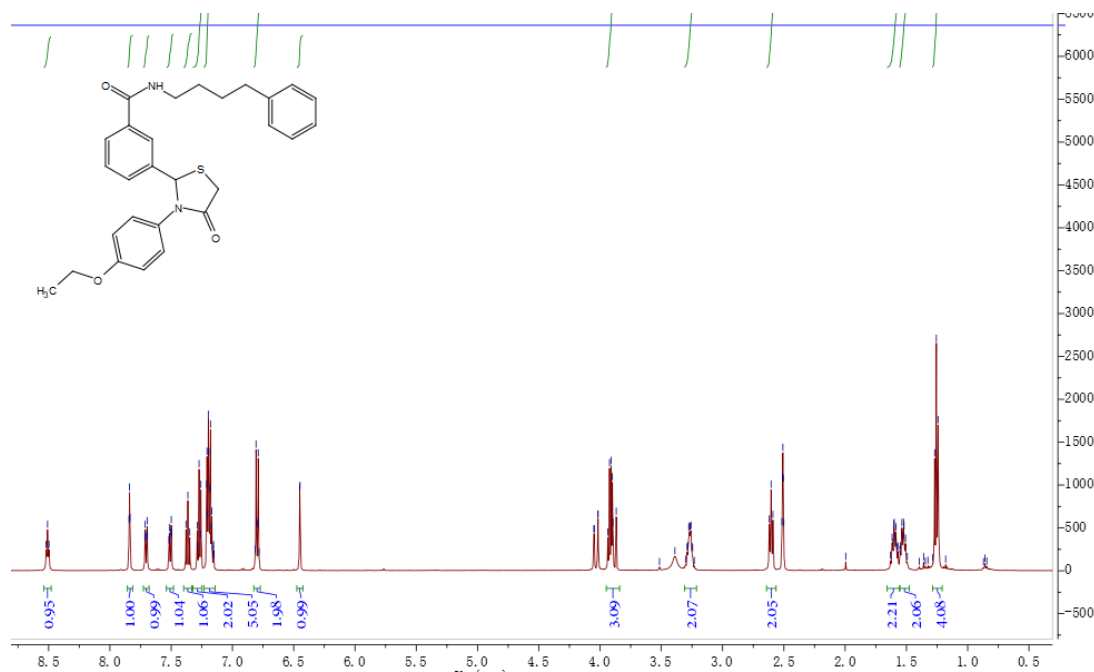

$^{13}\text{C}$  NMR spectrum of **A3**.

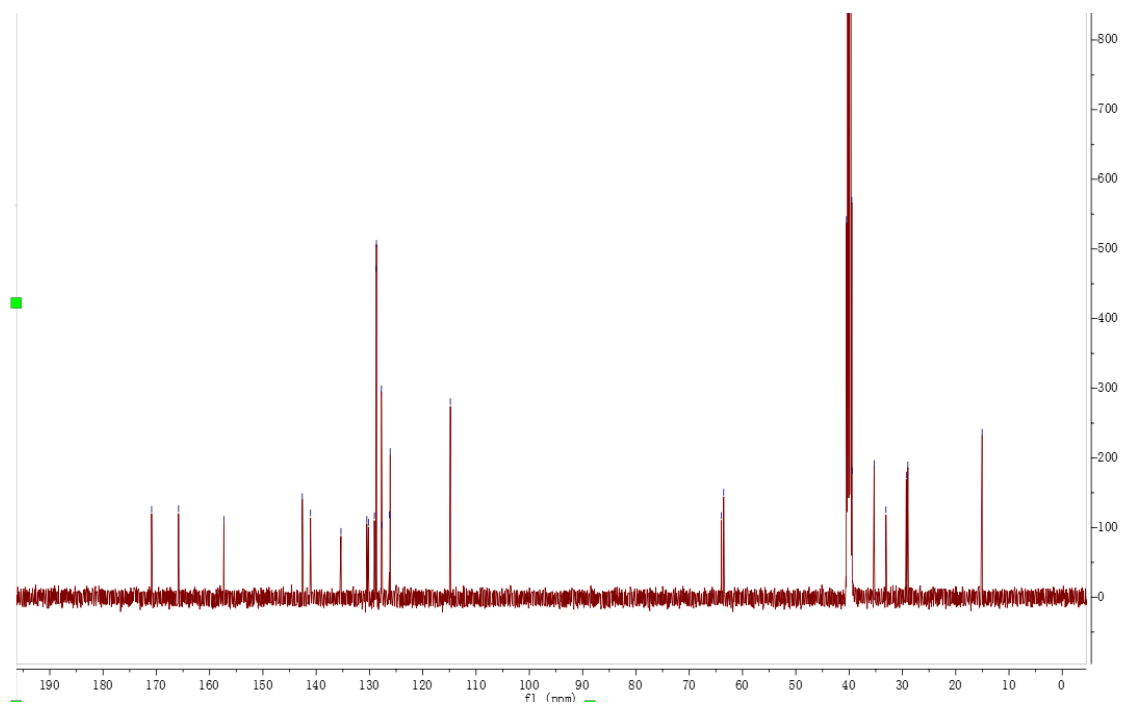

HR MS spectrum of **A3**.

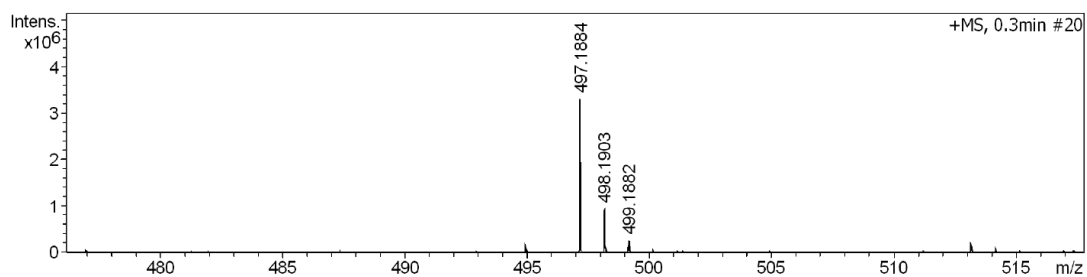

| # | m/z      | Res.  | S/N    | I       | I %   | FWHM   |
|---|----------|-------|--------|---------|-------|--------|
| 1 | 497.1884 | 23375 | 2968.1 | 3297960 | 100.0 | 0.0213 |
| 2 | 498.1903 | 27842 | 853.1  | 947492  | 28.7  | 0.0179 |
| 3 | 499.1882 | 20662 | 231.2  | 256504  | 7.8   | 0.0242 |

| Meas. m/z | # | Ion Formula                                                       | m/z      | err [ppm] | mSigma | Score | rdb   | e <sup>-</sup> | Conf | N-Rule |
|-----------|---|-------------------------------------------------------------------|----------|-----------|--------|-------|-------|----------------|------|--------|
| 497.1884  | 1 | C <sub>28</sub> H <sub>30</sub> N <sub>2</sub> NaO <sub>3</sub> S | 497.1869 | -2.9      | 21.4   | 1     | 56.41 | 14.5           | even | ok     |

HPLC spectrum of **A3**.

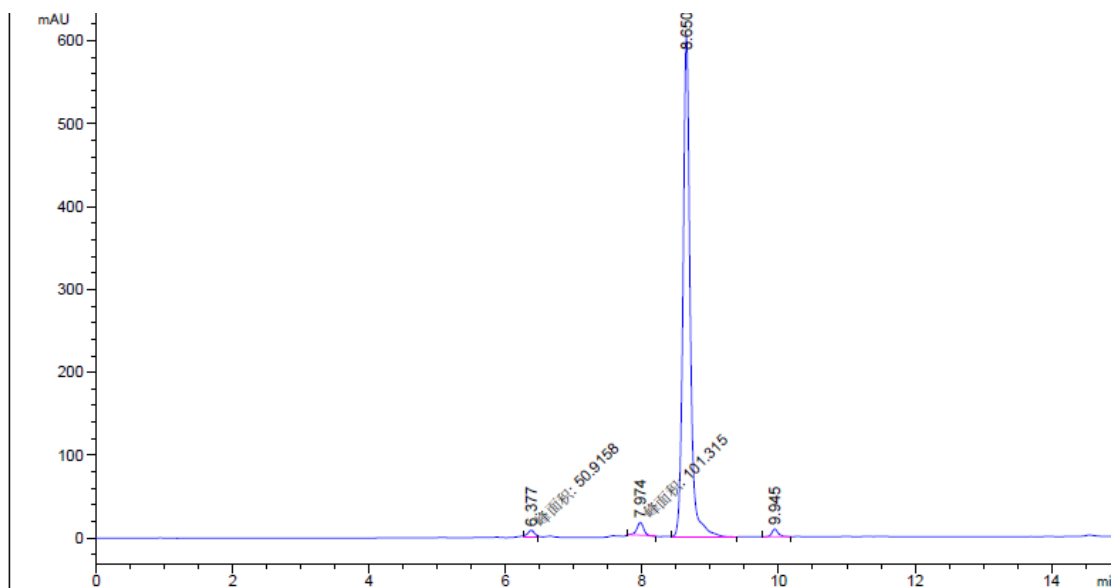

#### 面积百分比报告

排序 : 信号  
 乘积因子: : 1.0000  
 稀释因子: : 1.0000  
 内标使用乘积因子和稀释因子

信号 1: VWD1 A, 波长=254 nm

| 峰 # | 保留时间 [min] | 类型 | 峰宽 [min] | 峰面积 mAU *s | 峰高 [mAU]  | 峰面积 %   |
|-----|------------|----|----------|------------|-----------|---------|
| 1   | 6.377      | MM | 0.1099   | 50.91585   | 7.71920   | 1.0944  |
| 2   | 7.974      | MM | 0.1092   | 101.31451  | 15.45693  | 2.1776  |
| 3   | 8.650      | VV | 0.1090   | 4437.38672 | 604.40155 | 95.3759 |
| 4   | 9.945      | VB | 0.0998   | 62.90944   | 9.41531   | 1.3522  |

总量 : 4652.52651 636.99299

<sup>1</sup>H-NMR spectrum of A4.

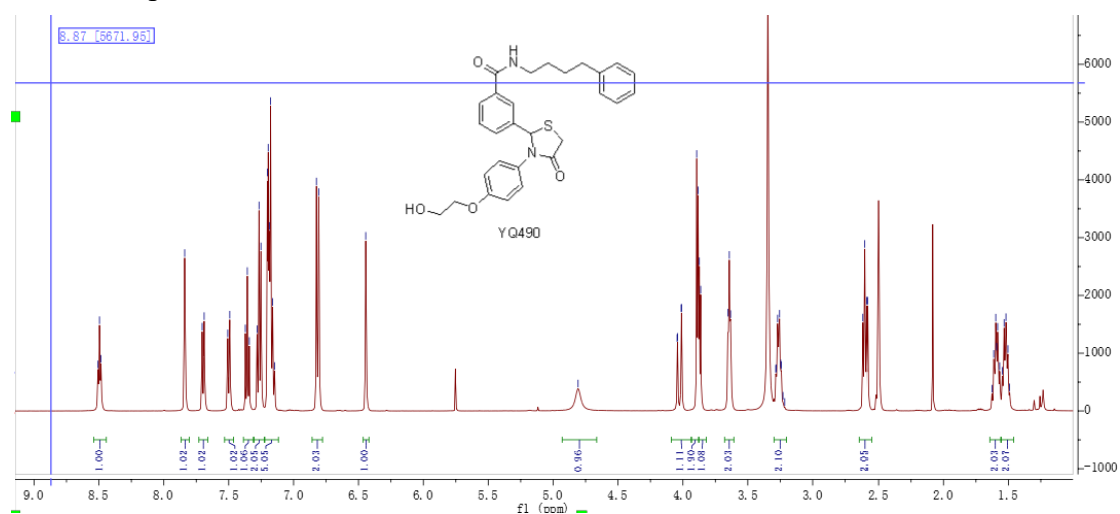

<sup>13</sup>C NMR spectrum of A4.



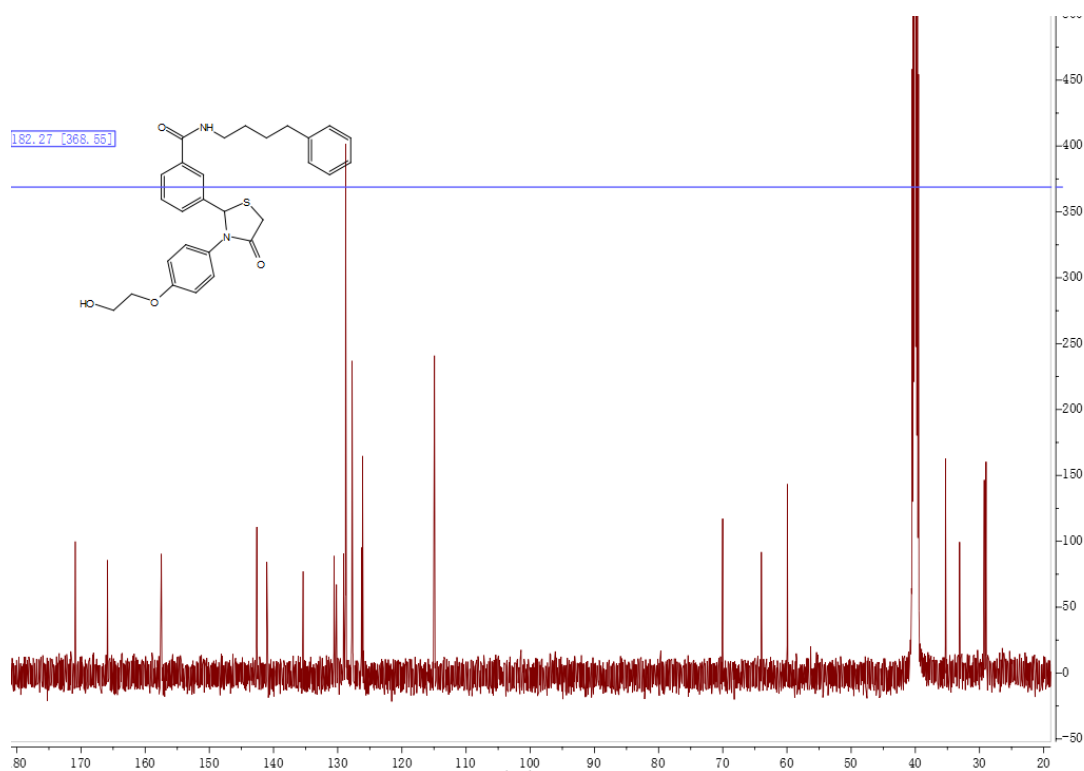

HR MS spectrum of A4.

#### Acquisition Parameter

|             |          |                       |           |                  |           |
|-------------|----------|-----------------------|-----------|------------------|-----------|
| Source Type | ESI      | Ion Polarity          | Positive  | Set Nebulizer    | 1.5 Bar   |
| Focus       | Active   | Set Capillary         | 4500 V    | Set Dry Heater   | 180 °C    |
| Scan Begin  | 50 m/z   | Set End Plate Offset  | -500 V    | Set Dry Gas      | 6.0 l/min |
| Scan End    | 1350 m/z | Set Collision Cell RF | 700.0 Vpp | Set Divert Valve | Waste     |

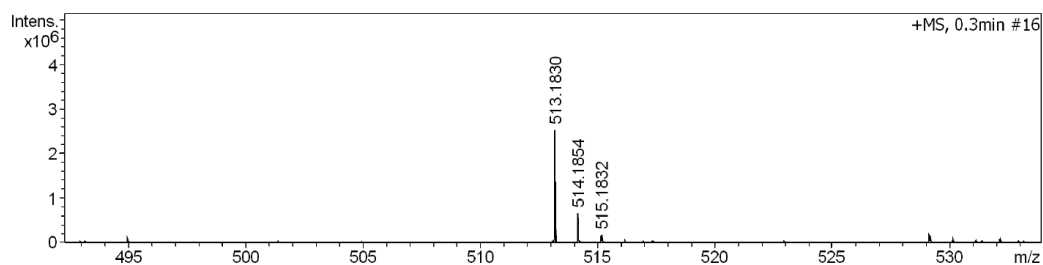

| # | m/z      | Res.  | S/N    | I       | I %   | FWHM   |
|---|----------|-------|--------|---------|-------|--------|
| 1 | 513.1830 | 27382 | 2208.8 | 2531572 | 100.0 | 0.0187 |
| 2 | 514.1854 | 25660 | 603.0  | 690792  | 27.3  | 0.0200 |
| 3 | 515.1832 | 19316 | 163.3  | 187032  | 7.4   | 0.0267 |

| Meas. m/z | # | Ion Formula   | m/z      | err [ppm] | mSigma | Score | rdb   | e <sup>-</sup> Conf | N-Rule     |
|-----------|---|---------------|----------|-----------|--------|-------|-------|---------------------|------------|
| 513.1830  | 1 | C28H30N2NaO4S | 513.1818 | -2.3      | 29.2   | 3     | 50.95 | 14.5                | even<br>ok |

HPLC spectrum of A4.

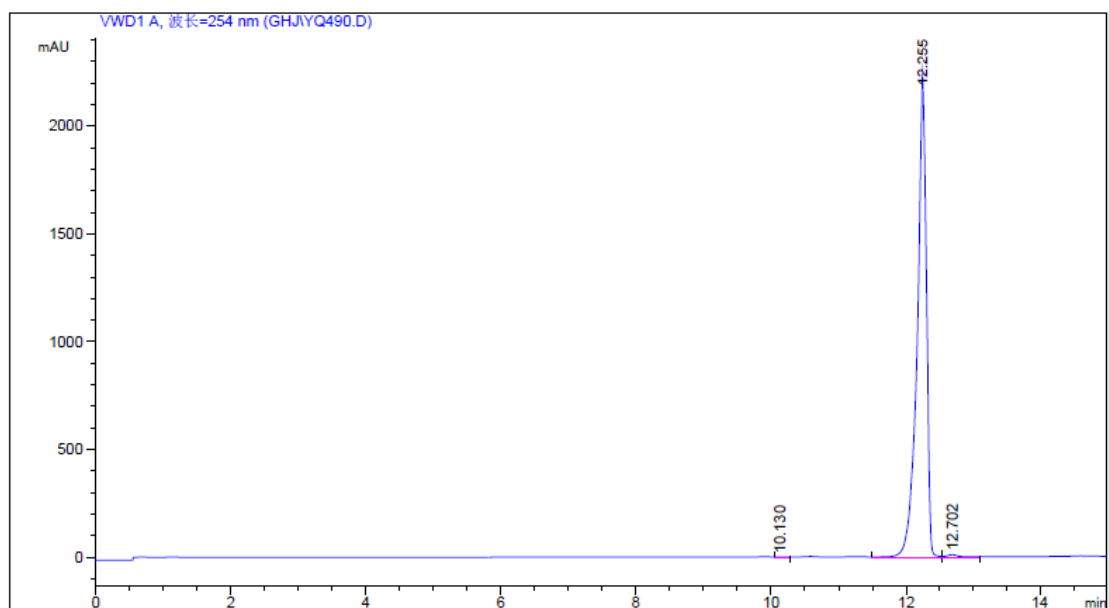

=====  
 面积百分比报告  
 =====

排序 : 信号  
 乘积因子: : 1.0000  
 稀释因子: : 1.0000  
 内标使用乘积因子和稀释因子

信号 1: VWD1 A, 波长=254 nm

| 峰 # | 保留时间 [min] | 类型 | 峰宽 [min] | 峰面积 mAU *s | 峰高 [mAU]   | 峰面积 %   |
|-----|------------|----|----------|------------|------------|---------|
| 1   | 10.130     | VV | 0.1602   | 12.00046   | 1.06780    | 0.0498  |
| 2   | 12.255     | VV | 0.1614   | 2.39487e4  | 2288.95288 | 99.3432 |
| 3   | 12.702     | VB | 0.1772   | 146.33272  | 11.53133   | 0.6070  |

总量 : 2.41070e4 2301.55201

<sup>1</sup>H-NMR spectrum of **A5**.

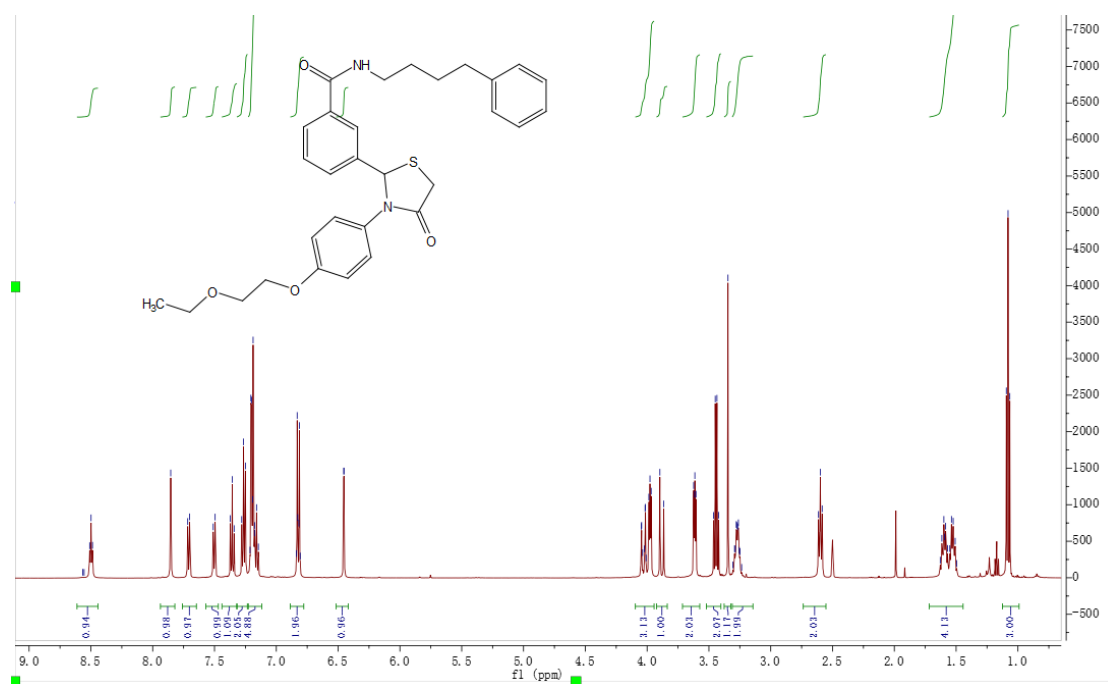

<sup>13</sup>C NMR spectrum of A5.

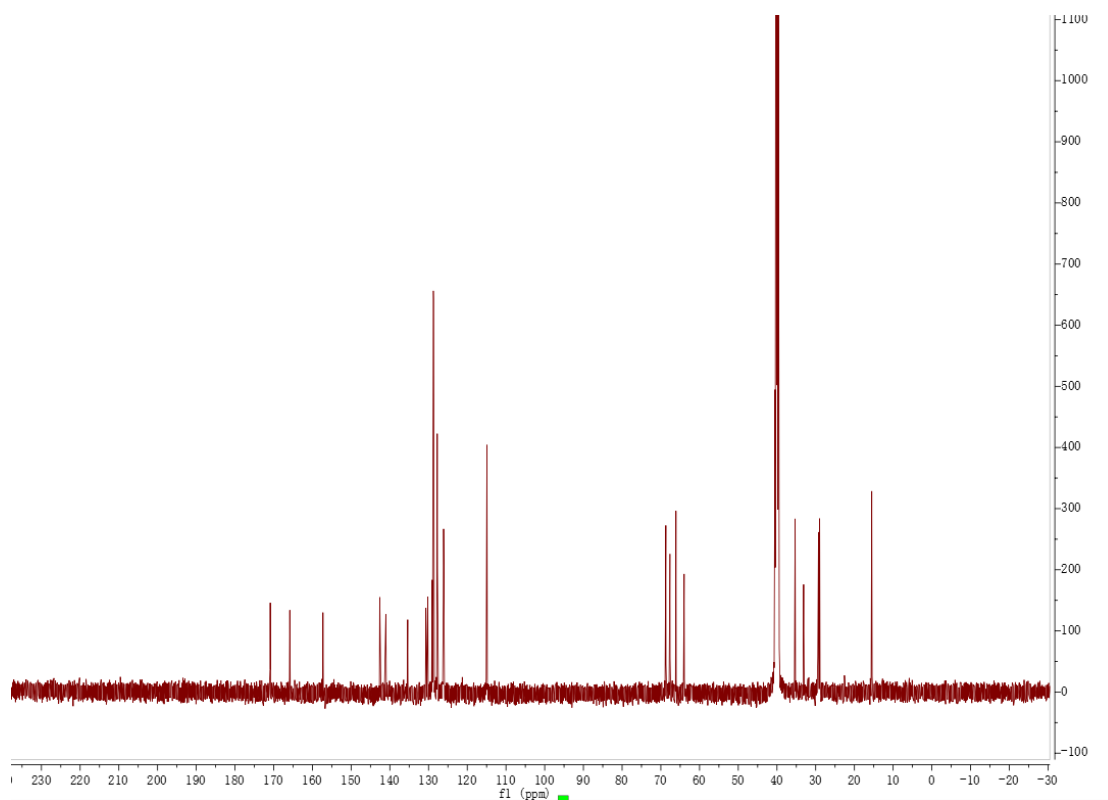

HR MS spectrum of A5.

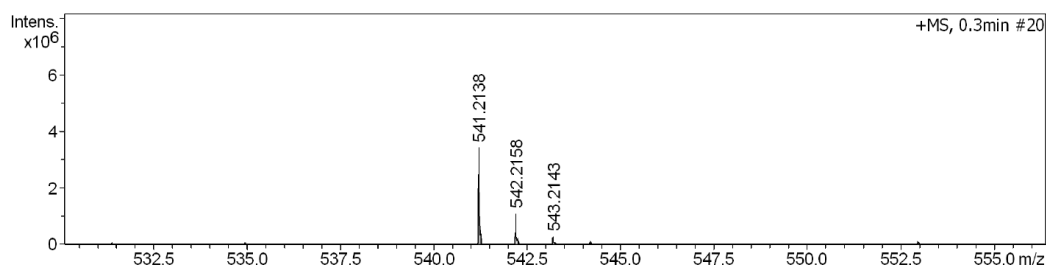

| # | m/z      | Res.  | S/N    | I       | I %   | FWHM   |
|---|----------|-------|--------|---------|-------|--------|
| 1 | 541.2138 | 21888 | 3240.1 | 3426364 | 100.0 | 0.0247 |
| 2 | 542.2158 | 30103 | 1061.2 | 1121368 | 32.7  | 0.0180 |
| 3 | 543.2143 | 22122 | 290.9  | 307236  | 9.0   | 0.0246 |
| 4 | 544.2142 | 17773 | 56.7   | 59888   | 1.7   | 0.0306 |

| Meas. m/z | # | Ion Formula   | m/z      | err [ppm] | mSigma | Score | rdB   | e <sup>-</sup> Conf | N-Rule  |
|-----------|---|---------------|----------|-----------|--------|-------|-------|---------------------|---------|
| 541.2138  | 1 | C30H34N2NaO4S | 541.2131 | -1.2      | 12.7   | 1     | 98.89 | 14.5                | even ok |

## HPLC spectrum of A5.

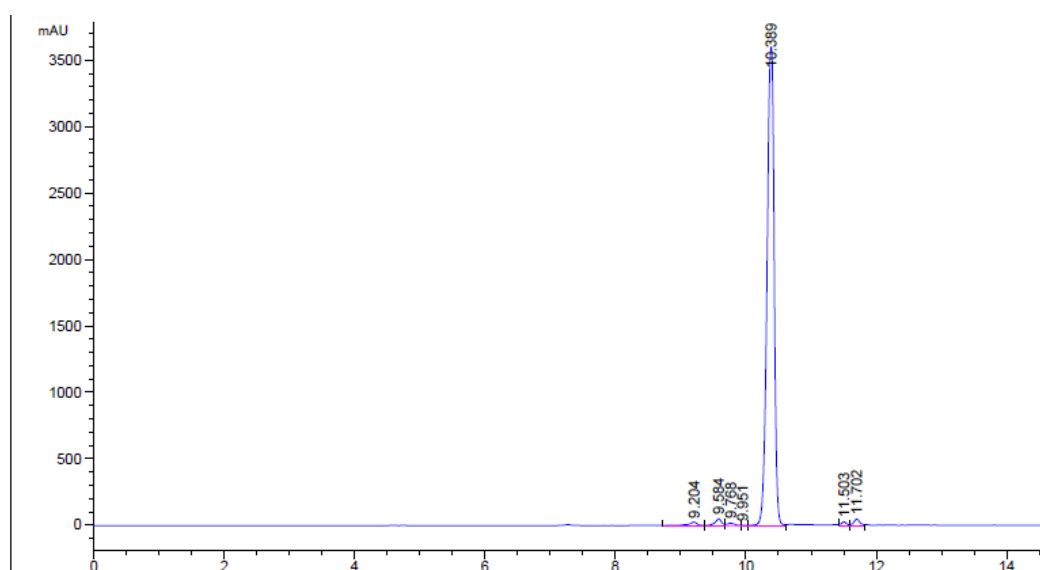

### 面积百分比报告

排序 : 信号  
 乘积因子: 1.0000  
 稀释因子: 1.0000  
 内标使用乘积因子和稀释因子

信号 1: VWD1 A, 波长=254 nm

| 峰 # | 保留时间 [min] | 类型 | 峰宽 [min] | 峰面积 mAU *s | 峰高 [mAU]   | 峰面积 %   |
|-----|------------|----|----------|------------|------------|---------|
| 1   | 9.204      | VV | 0.1302   | 246.96506  | 26.58918   | 0.8670  |
| 2   | 9.584      | VV | 0.0999   | 351.91422  | 50.69724   | 1.2354  |
| 3   | 9.768      | VV | 0.1256   | 147.11328  | 17.79389   | 0.5165  |
| 4   | 9.951      | VV | 0.0773   | 11.03711   | 2.05198    | 0.0387  |
| 5   | 10.389     | VV | 0.1174   | 2.72813e4  | 3606.45508 | 95.7726 |
| 6   | 11.503     | VV | 0.0800   | 144.62350  | 27.00417   | 0.5077  |
| 7   | 11.702     | VV | 0.0959   | 302.53372  | 47.62869   | 1.0621  |

总量 : 2.84854e4 3778.22022

## <sup>1</sup>H-NMR spectrum of A6.

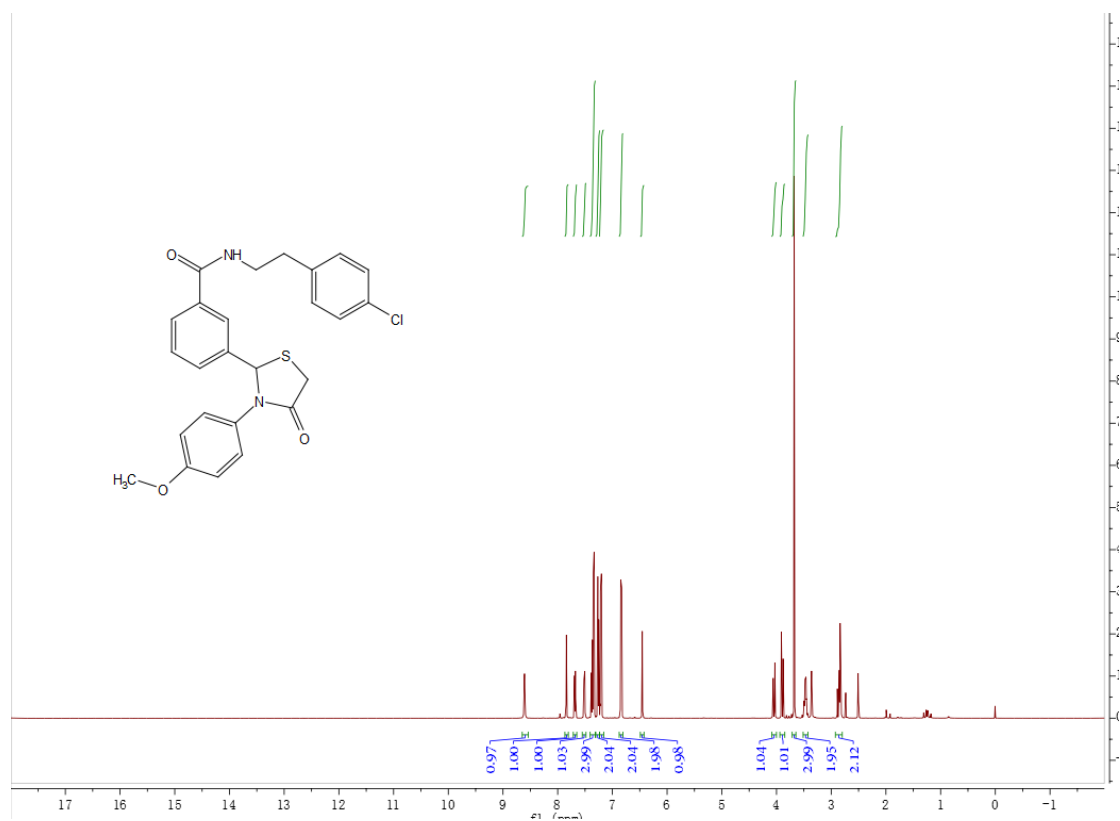

<sup>13</sup>C NMR spectrum of A6.

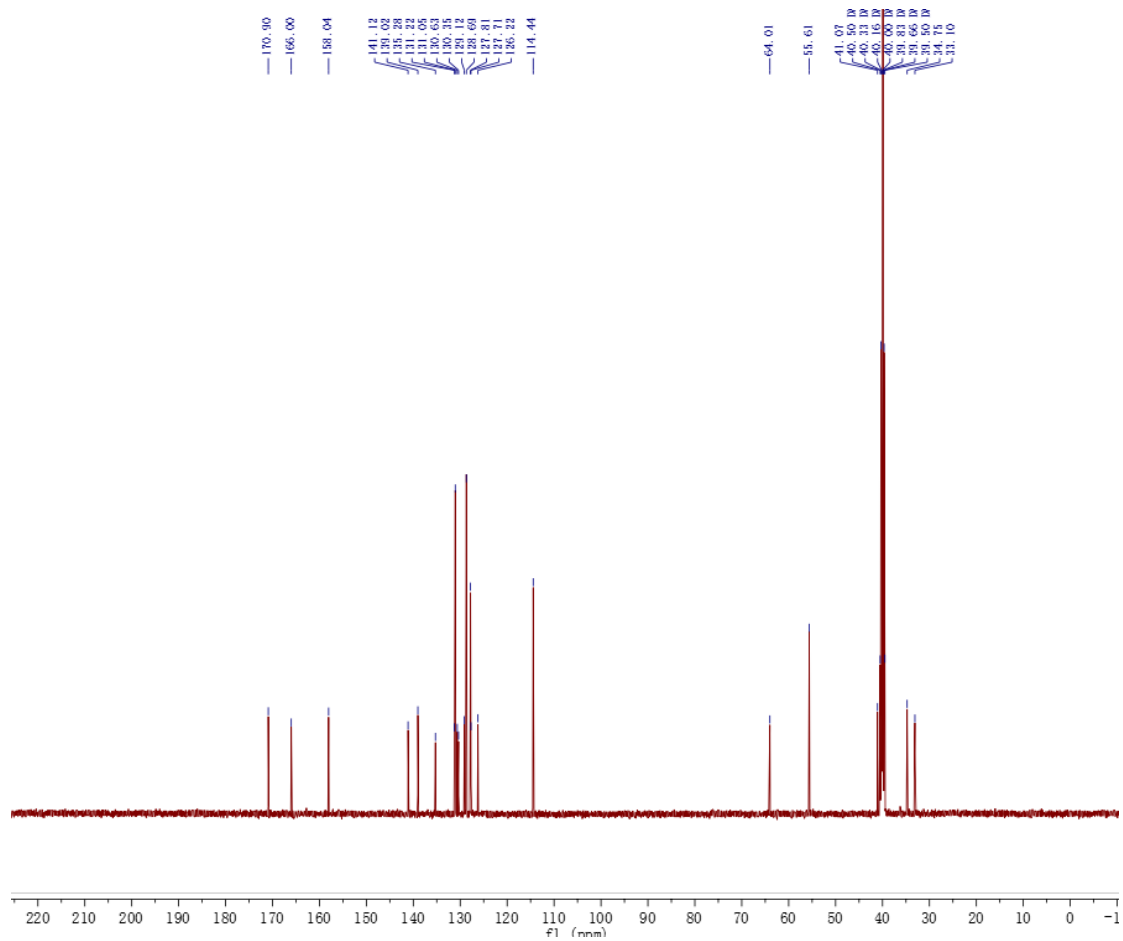

HR MS spectrum of A6.

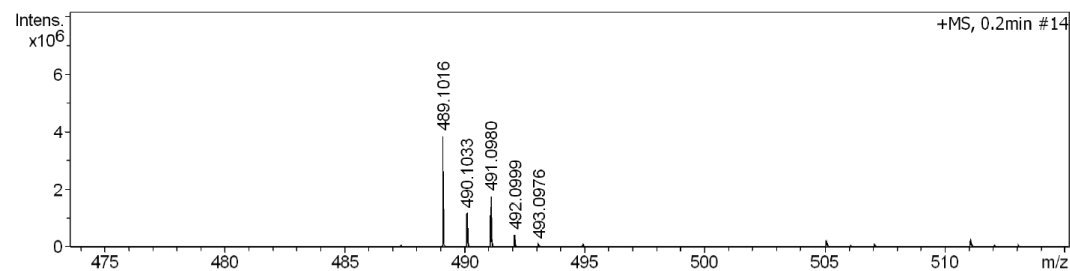

| # | m/z      | Res.  | S/N    | I       | I %   | FWHM   |
|---|----------|-------|--------|---------|-------|--------|
| 1 | 489.1016 | 18360 | 2934.8 | 3839992 | 100.0 | 0.0266 |
| 2 | 490.1033 | 29695 | 902.0  | 1180048 | 30.7  | 0.0165 |
| 3 | 491.0980 | 31137 | 1355.0 | 1772620 | 46.2  | 0.0158 |
| 4 | 492.0999 | 24996 | 325.1  | 425164  | 11.1  | 0.0197 |
| 5 | 493.0976 | 17386 | 81.6   | 106628  | 2.8   | 0.0284 |

| Meas. m/z | # | Ion Formula     | m/z      | err [ppm] | mSigma | Score | rdb    | e <sup>-</sup> Conf | N-Rule  |
|-----------|---|-----------------|----------|-----------|--------|-------|--------|---------------------|---------|
| 489.1016  | 1 | C25H23ClN2NaO3S | 489.1010 | -1.2      | 21.9   | 1     | 100.00 | 14.5                | even ok |

HPLC spectrum of A6.

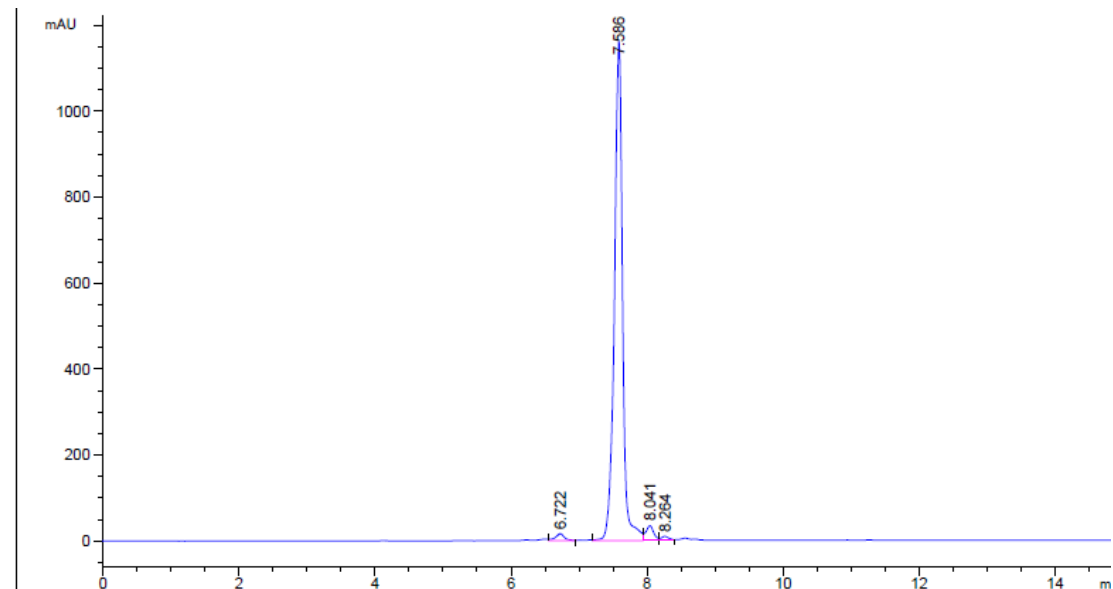

=====  
面积百分比报告  
=====

排序 : 信号  
乘积因子: 1.0000  
稀释因子: 1.0000  
内标使用乘积因子和稀释因子

信号 1: VWD1 A, 波长=254 nm

| 峰 # | 保留时间 [min] | 类型 | 峰宽 [min] | 峰面积 mAU *s | 峰高 [mAU]   | 峰面积 %   |
|-----|------------|----|----------|------------|------------|---------|
| 1   | 6.722      | VV | 0.1353   | 150.89954  | 16.13788   | 1.4784  |
| 2   | 7.586      | VV | 0.1265   | 9699.25391 | 1161.45764 | 95.0291 |
| 3   | 8.041      | VV | 0.1178   | 280.19705  | 34.58686   | 2.7452  |
| 4   | 8.264      | VV | 0.1138   | 76.26358   | 9.82962    | 0.7472  |

总量 : 1.02066e4 1222.01200

$^1\text{H}$ -NMR spectrum of **D1**.

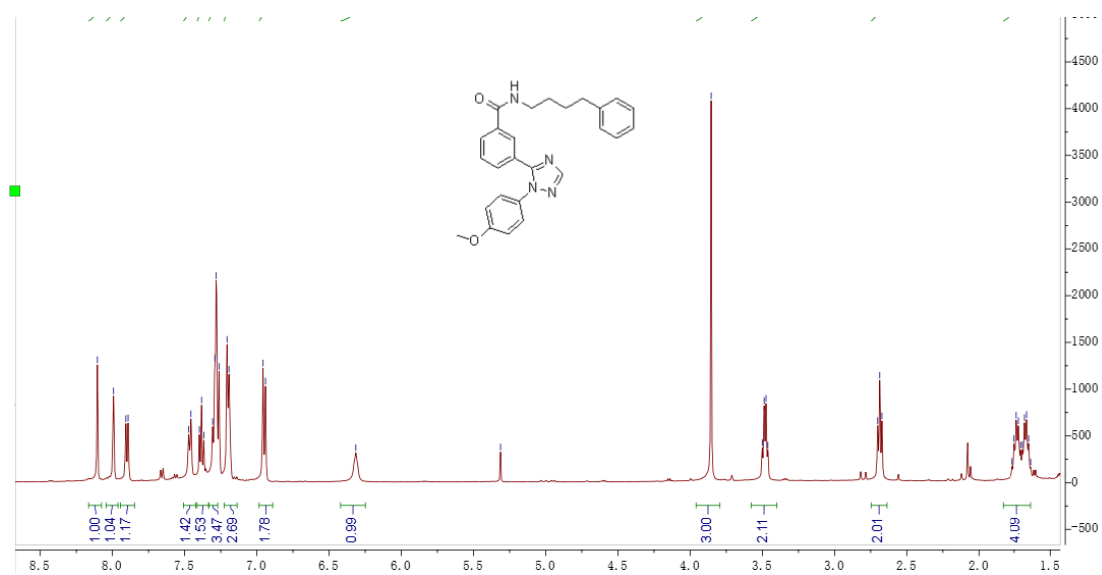

$^{13}\text{C}$  NMR spectrum of **D1**.

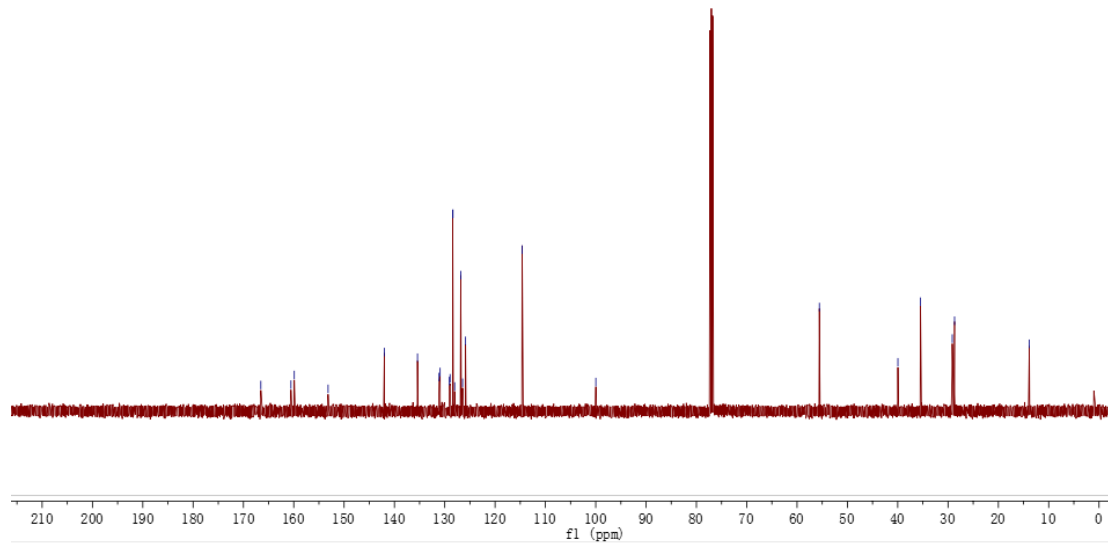

HR MS spectrum of **D1**.

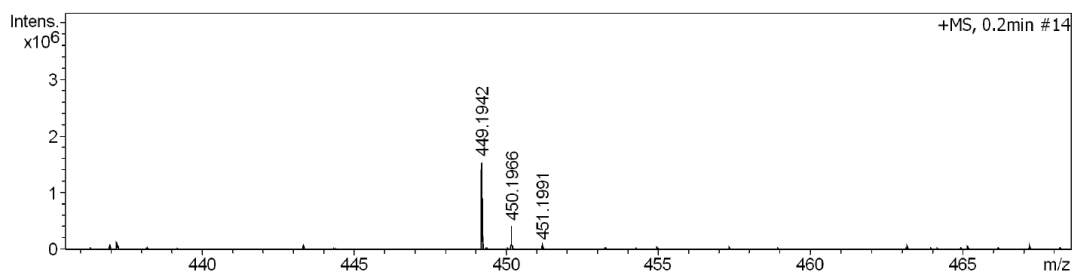

| # | m/z      | Res.  | S/N    | I       | I %   | FWHM   |
|---|----------|-------|--------|---------|-------|--------|
| 1 | 449.1942 | 30222 | 1213.2 | 1543412 | 100.0 | 0.0149 |
| 2 | 450.1966 | 24543 | 322.5  | 410200  | 26.6  | 0.0183 |
| 3 | 451.1991 | 20293 | 51.7   | 65796   | 4.3   | 0.0222 |

| Meas. m/z | # | Ion Formula                                                     | m/z      | err [ppm] | mSigma | Score | rdb   | e <sup>-</sup> Conf | N-Rule     |
|-----------|---|-----------------------------------------------------------------|----------|-----------|--------|-------|-------|---------------------|------------|
| 449.1942  | 1 | C <sub>26</sub> H <sub>26</sub> N <sub>4</sub> NaO <sub>2</sub> | 449.1948 | 1.4       | 17.1   | 2     | 83.96 | 15.5                | even<br>ok |

### HPLC spectrum of D1.

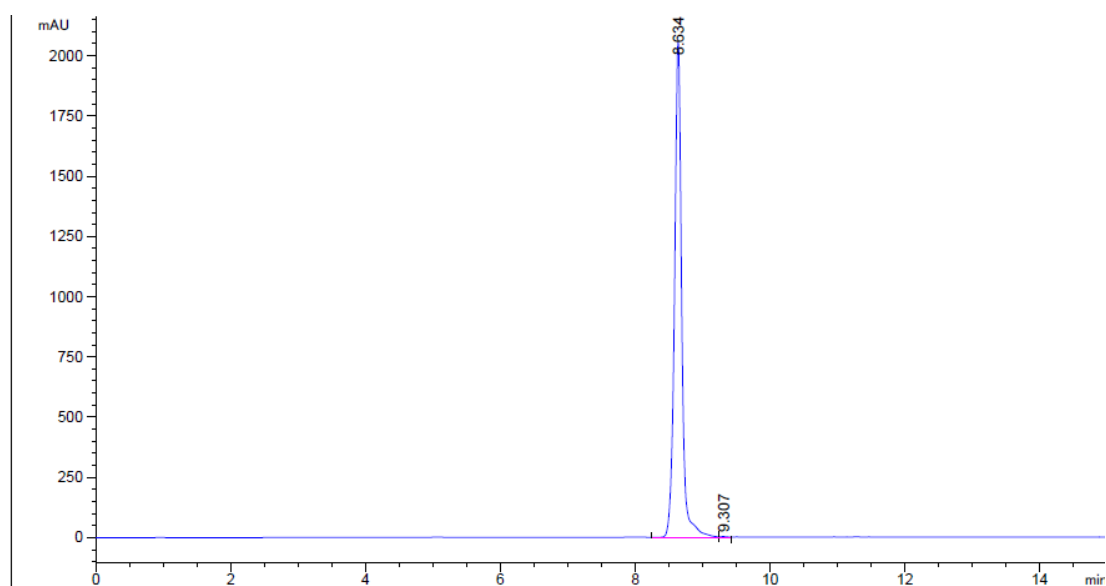

#### 面积百分比报告

排序 : 信号  
 乘积因子: 1.0000  
 稀释因子: 1.0000  
 内标使用乘积因子和稀释因子

信号 1: VWD1 A, 波长=254 nm

| 峰 # | 保留时间 [min] | 类型 | 峰宽 [min] | 峰面积 mAU * s | 峰高 [mAU]   | 峰面积 %   |
|-----|------------|----|----------|-------------|------------|---------|
| 1   | 8.634      | VV | 0.1117   | 1.53347e4   | 2057.62061 | 99.8582 |
| 2   | 9.307      | VV | 0.1096   | 21.76803    | 2.89327    | 0.1418  |

总量 : 1.53565e4 2060.51388

### <sup>1</sup>H-NMR spectrum of E2.



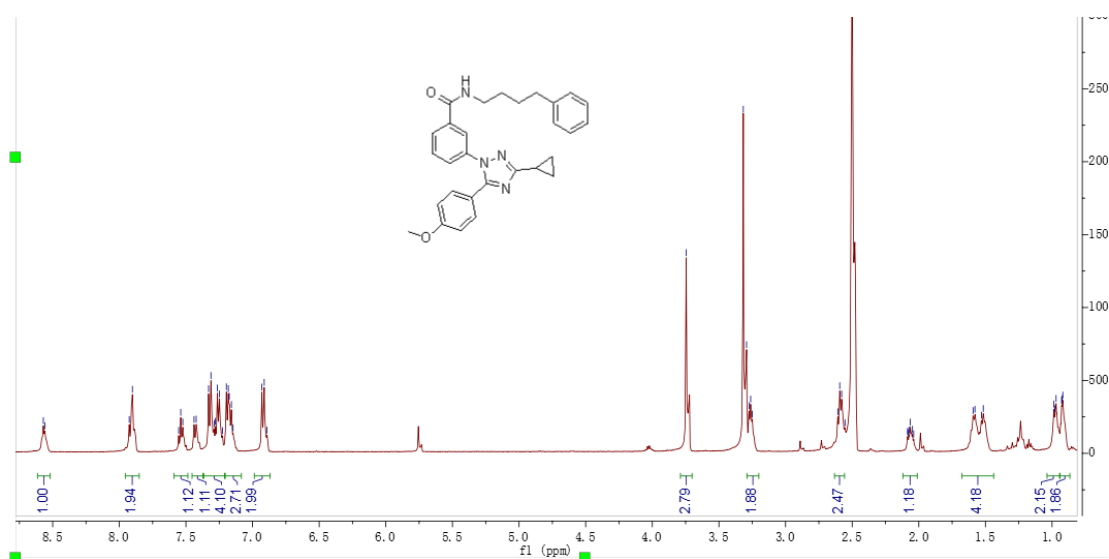

<sup>13</sup>C NMR spectrum of E2.

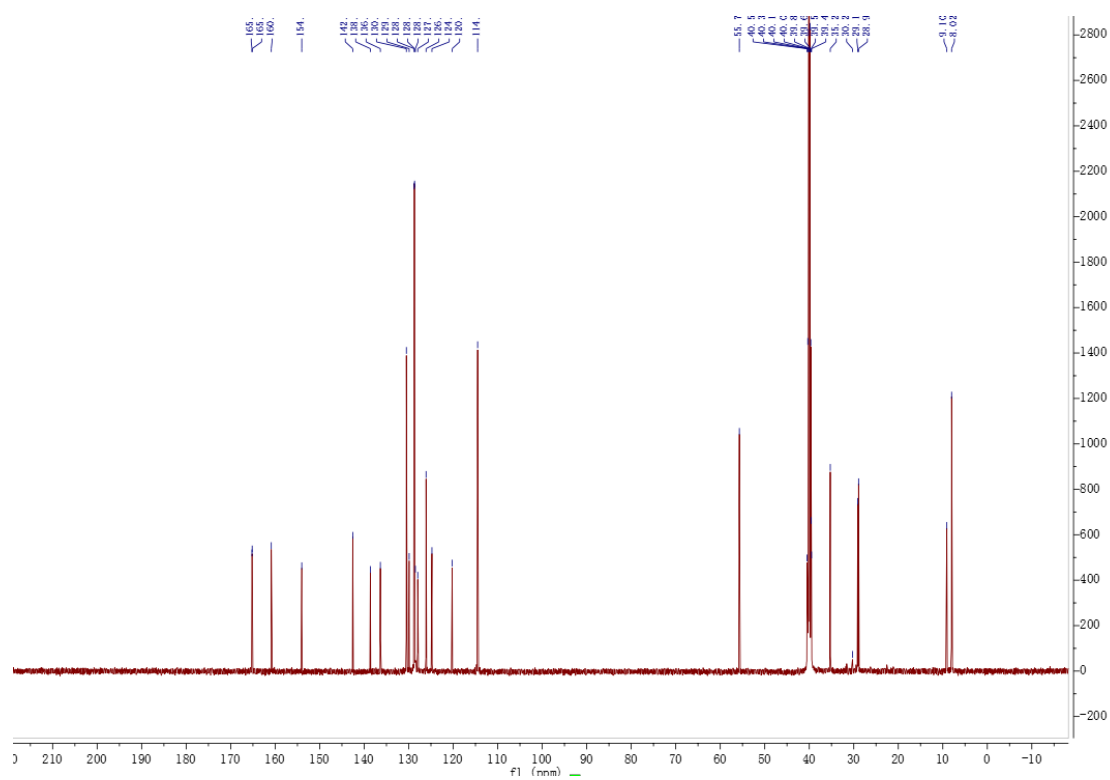

HR MS spectrum of E2.

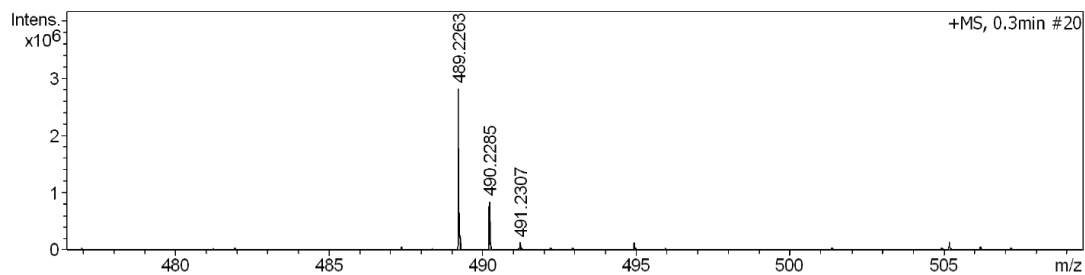

| # | m/z      | Res.  | S/N    | I       | I %   | FWHM   |
|---|----------|-------|--------|---------|-------|--------|
| 1 | 489.2263 | 24918 | 2542.3 | 2810684 | 100.0 | 0.0196 |
| 2 | 490.2285 | 27650 | 764.6  | 845256  | 30.1  | 0.0177 |
| 3 | 491.2307 | 19374 | 116.2  | 128456  | 4.6   | 0.0254 |

| Meas. m/z | # | Ion Formula                                                     | m/z      | err [ppm] | mSigma | Score | rdb    | e <sup>-</sup> | Conf | N-Rule |
|-----------|---|-----------------------------------------------------------------|----------|-----------|--------|-------|--------|----------------|------|--------|
| 489.2263  | 1 | C <sub>29</sub> H <sub>30</sub> N <sub>4</sub> NaO <sub>2</sub> | 489.2261 | -0.4      | 17.0   | 2     | 100.00 | 16.5           | even | ok     |

## HPLC spectrum of E2.

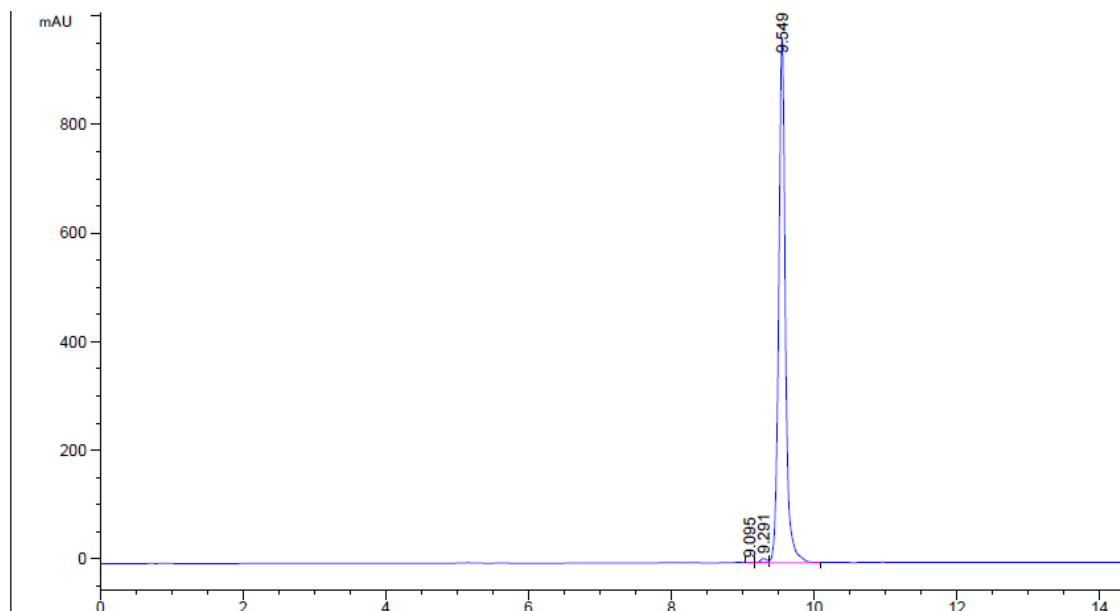

### 面积百分比报告

排序 : 信号  
 乘积因子: 1.0000  
 稀释因子: 1.0000  
 内标使用乘积因子和稀释因子

信号 1: VWD1 A, 波长=254 nm

| 峰 # | 保留时间 [min] | 类型 | 峰宽 [min] | 峰面积 mAU * s | 峰高 [mAU]   | 峰面积 %   |
|-----|------------|----|----------|-------------|------------|---------|
| 1   | 9.095      | VV | 0.0886   | 3.14392     | 5.26633e-1 | 0.0491  |
| 2   | 9.291      | VV | 0.0950   | 48.81165    | 7.78783    | 0.7627  |
| 3   | 9.549      | VV | 0.1000   | 6347.69727  | 966.05048  | 99.1882 |

总量 : 6399.65284 974.36494

## <sup>1</sup>H-NMR spectrum of E4.

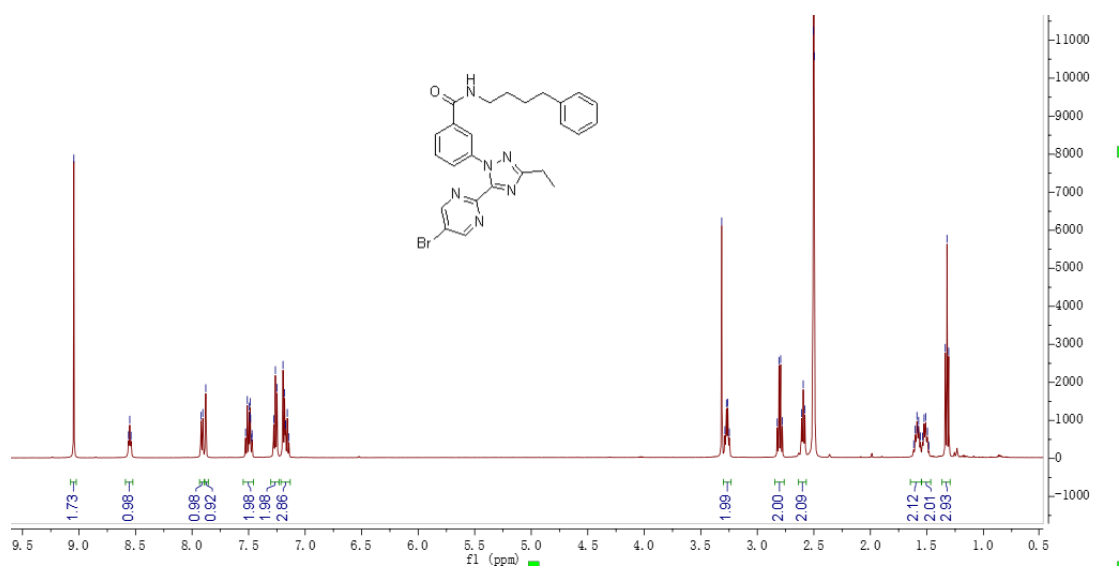

<sup>13</sup>C NMR spectrum of E4.

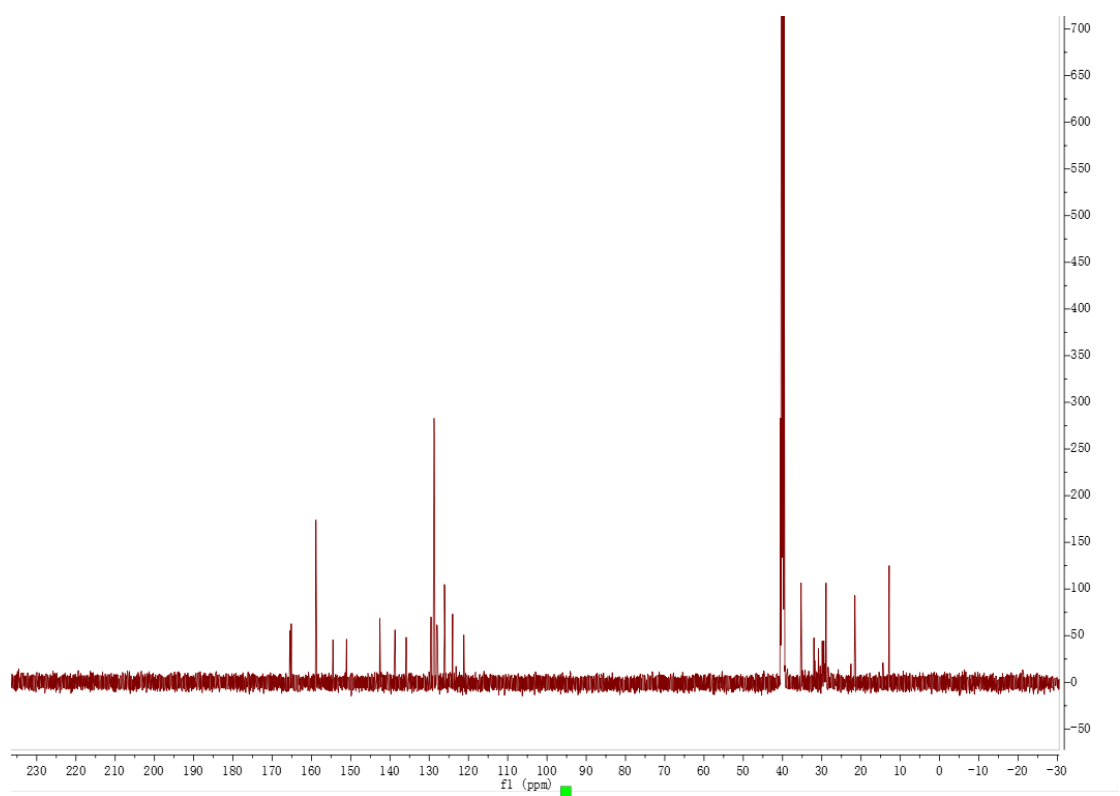

HR MS spectrum of E4.

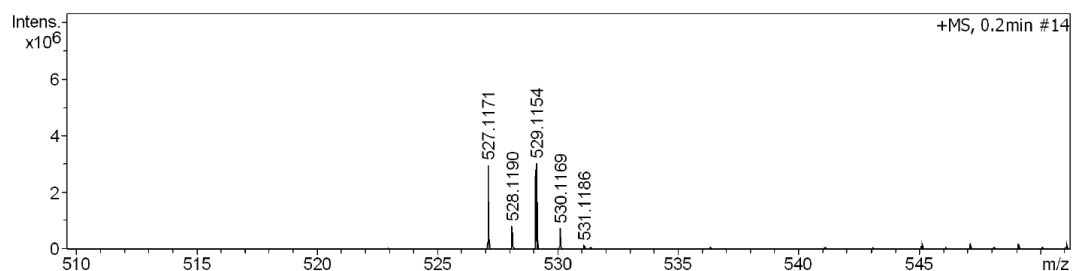

| # | m/z      | Res.  | S/N    | I       | I %   | FWHM   |
|---|----------|-------|--------|---------|-------|--------|
| 1 | 527.1171 | 25093 | 2325.1 | 2961972 | 98.1  | 0.0210 |
| 2 | 528.1190 | 28211 | 624.6  | 794864  | 26.3  | 0.0187 |
| 3 | 529.1154 | 25349 | 2375.2 | 3019724 | 100.0 | 0.0209 |
| 4 | 530.1169 | 26900 | 576.3  | 732164  | 24.2  | 0.0197 |
| 5 | 531.1186 | 19723 | 86.6   | 109928  | 3.6   | 0.0269 |

|           |   |               |          |           |        |       |        |                |      |        |
|-----------|---|---------------|----------|-----------|--------|-------|--------|----------------|------|--------|
| Meas. m/z | # | Ion Formula   | m/z      | err [ppm] | mSigma | Score | rdb    | e <sup>-</sup> | Conf | N-Rule |
| 527.1171  | 1 | C25H25BrN6NaO | 527.1165 | -1.0      | 21.6   | 2     | 100.00 | 15.5           | even | ok     |

## HPLC spectrum of E4.

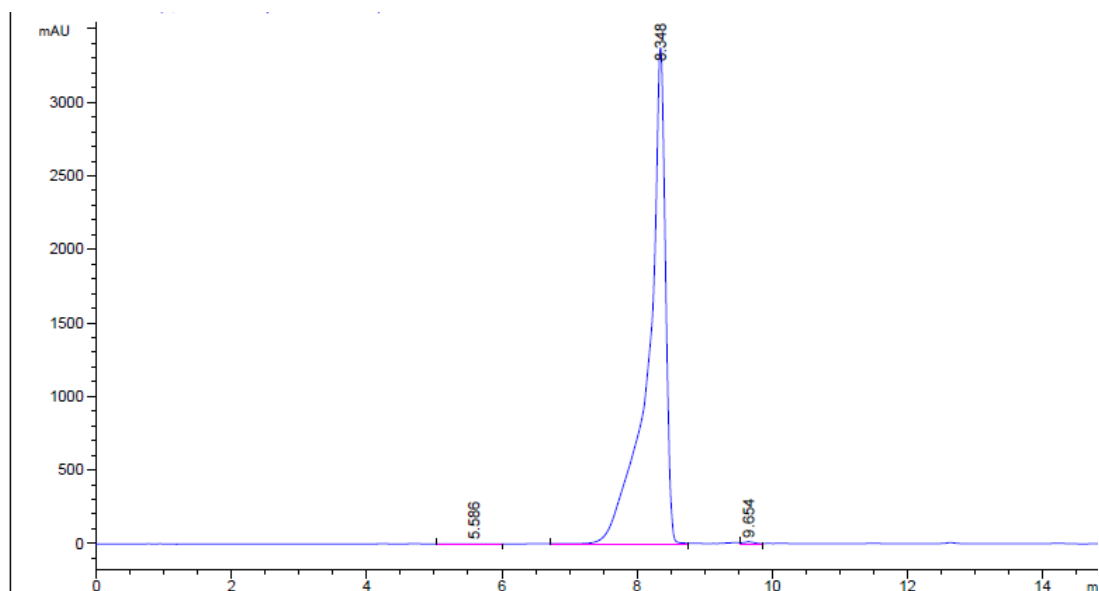

### 面积百分比报告

排序 : 信号  
 乘积因子: 1.0000  
 稀释因子: 1.0000  
 内标使用乘积因子和稀释因子

信号 1: VWD1 A, 波长=254 nm

| 峰 # | 保留时间 [min] | 类型 | 峰宽 [min] | 峰面积 mAU *s | 峰高 [mAU]   | 峰面积 %   |
|-----|------------|----|----------|------------|------------|---------|
| 1   | 5.586      | VV | 0.4870   | 68.20441   | 1.76011    | 0.1134  |
| 2   | 8.348      | VV | 0.2390   | 5.98826e4  | 3375.22192 | 99.5577 |
| 3   | 9.654      | VV | 0.1663   | 197.85706  | 16.65076   | 0.3289  |

总量 : 6.01487e4 3393.63280

- Adinarayana Nandikoll SS, Karan Kumar Banoth *et al.* Design, synthesis and evaluation of novel phenanthridine triazole analogs as potential antileishmanial agents. *Future Med. Chem.* 14(12), 867-880 (2022)
